# Supplementary material for: Poly(3-hexylthiophene)/zinc phthalocyanine composites for advanced interface engineering of 10.03%-efficiency CsPbBr3 perovskite solar cells
Source: Royal Society of Chemistry journal article supplement (doi:10.1039/c9ta01151j), 2019-01-01
Supplement: c9ta01151j1.pdf [file c9ta01151j1.pdf]

## Supporting Information

### **Poly(3-hexylthiophene)/zinc phthalocyanine composites for advanced interface engineering of 10.03%-efficiency CsPbBr<sub>3</sub> perovskite solar cells**

Yu liu,<sup>a</sup> Benlin He,<sup>\*a</sup> Jialong Duan,<sup>a</sup> Yuanyuan Zhao,<sup>a</sup> Yang Ding,<sup>a</sup> Mixue Tang,<sup>a</sup>  
Haiyan Chen<sup>a</sup> and Qunwei Tang<sup>\*b</sup>

<sup>a</sup> *School of Materials Science and Engineering, Ocean University of China, Qingdao 266100, P.R. China*

<sup>b</sup> *Institute of New Energy Technology, College of Information Science and Technology, Jinan University, Guangzhou 510632, P.R. China*

**\* Corresponding Authors.** E-mail: blhe@ouc.edu.cn, tangqunwei@jnu.edu.cn

a

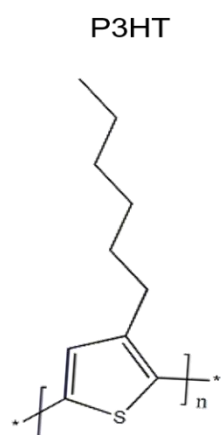

b

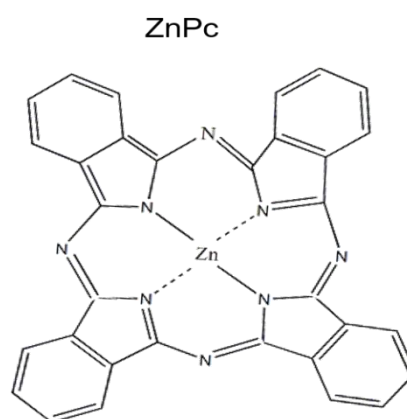

**Fig. S1.** Chemical structures of (a) P3HT and (b) ZnPc.

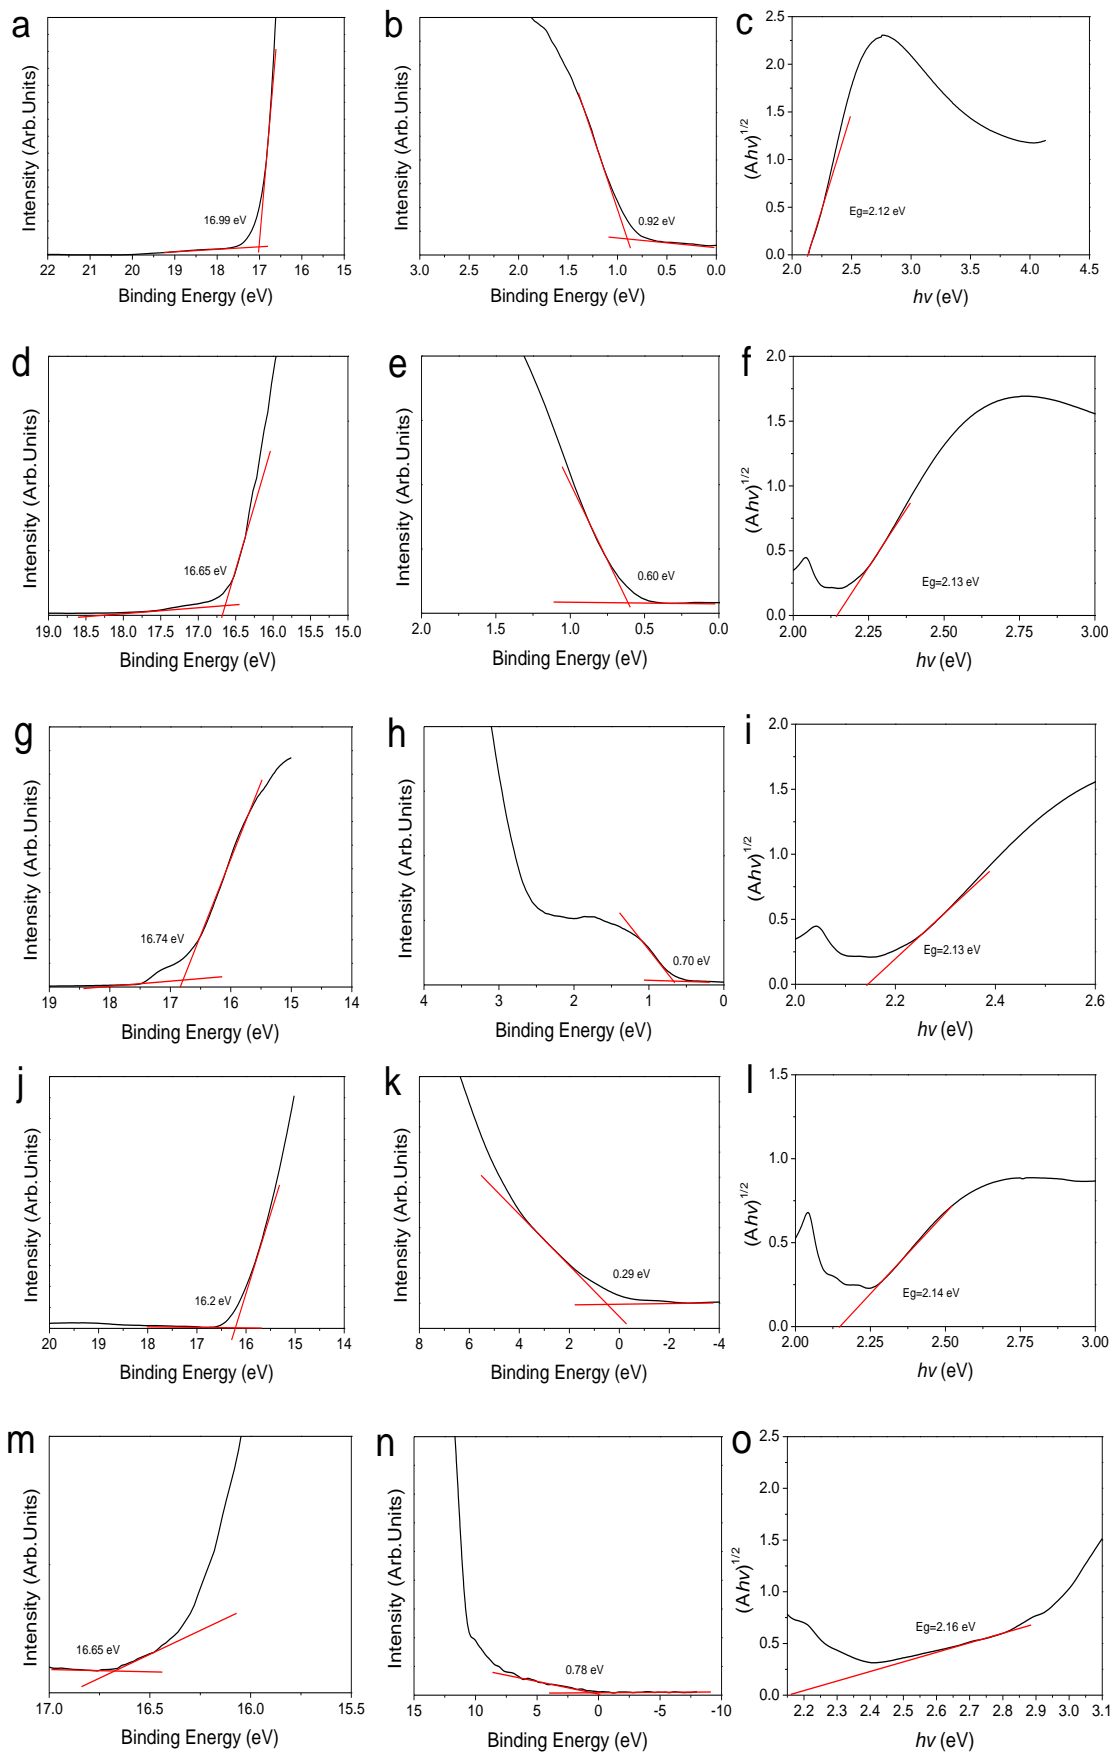

**Fig. S2.** UPS of (a) and (b) P3HT, (d) and (e) P2Z1, (g) and (h) P1Z1, (j) and (k)

P1Z2, and (m) and (n) ZnPc. The curves of  $(Ah\nu)^{1/2}$  as a function of  $h\nu$  for (c) P3HT, (f) P2Z1, (i) P1Z1, (l) P1Z2 and (o) ZnPc.

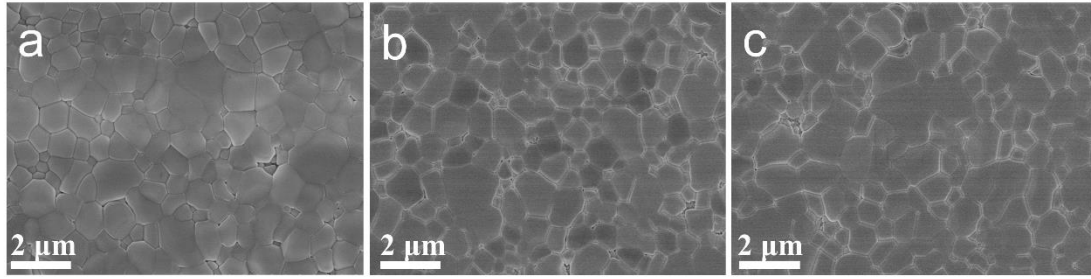

**Fig. S3.** Top-view SEM images of CsPbBr<sub>3</sub> after (a) 200 °C annealed, (b) CB treated, and (c) 200 °C annealed after CB treated.

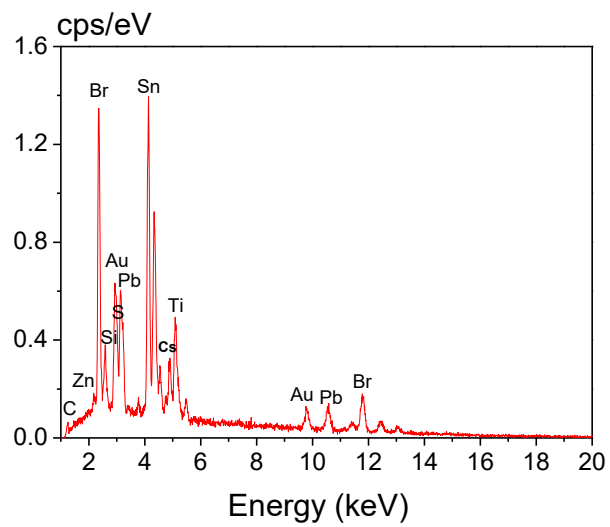

**Fig. S4.** EDS of P1Z1 deposited on CsPbBr<sub>3</sub> film.

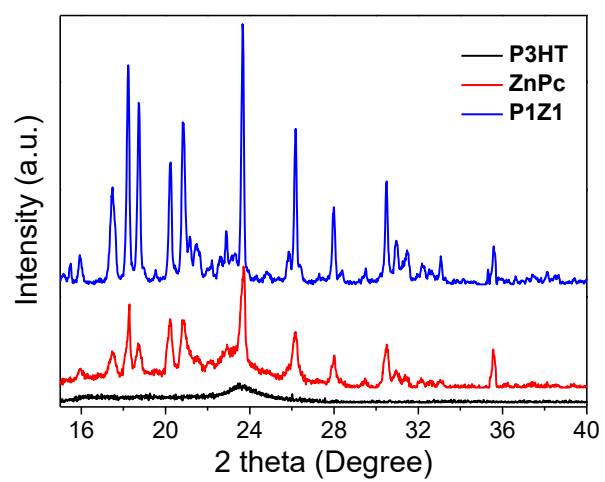

**Fig. S5.** The XRD patterns of ZnPc, P3HT and P1Z1 powder.

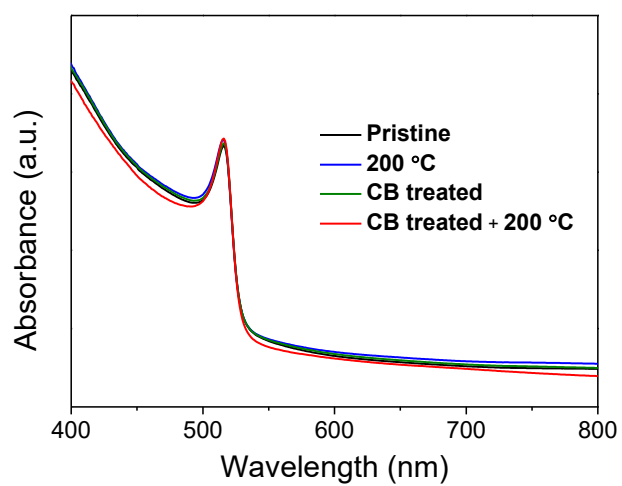

**Fig. S6.** UV-vis absorption spectra of pristine CsPbBr<sub>3</sub>, and CsPbBr<sub>3</sub> after 200 °C annealed, CB treated, and 200 °C annealed after CB treated.



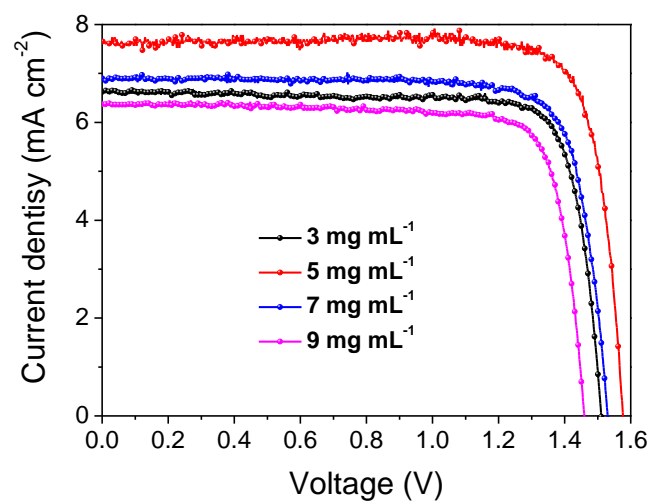

**Fig. S7.** Photocurrent–voltage ( $J-V$ ) curves under air mass 1.5 global (AM1.5G, 100 mW cm<sup>-2</sup>) for CsPbBr<sub>3</sub> PSCs based on P1Z1 HTM with different concentrations.

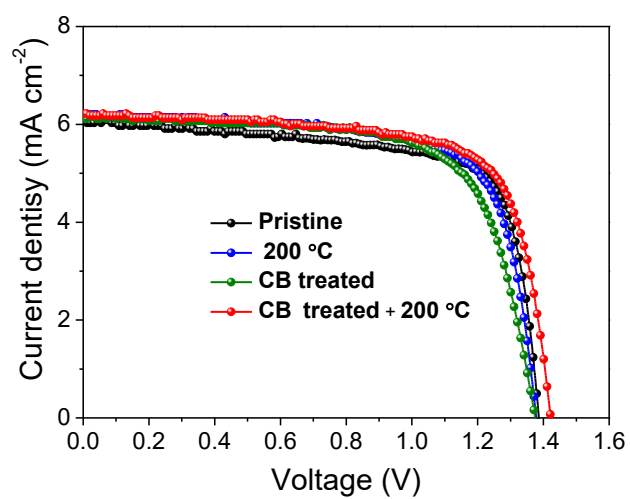

**Fig. S8.** Photocurrent–voltage ( $J-V$ ) curves of device based on pristine CsPbBr<sub>3</sub>, and CsPbBr<sub>3</sub> after 200 °C annealed, CB treated, and 200 °C annealed after CB treated.

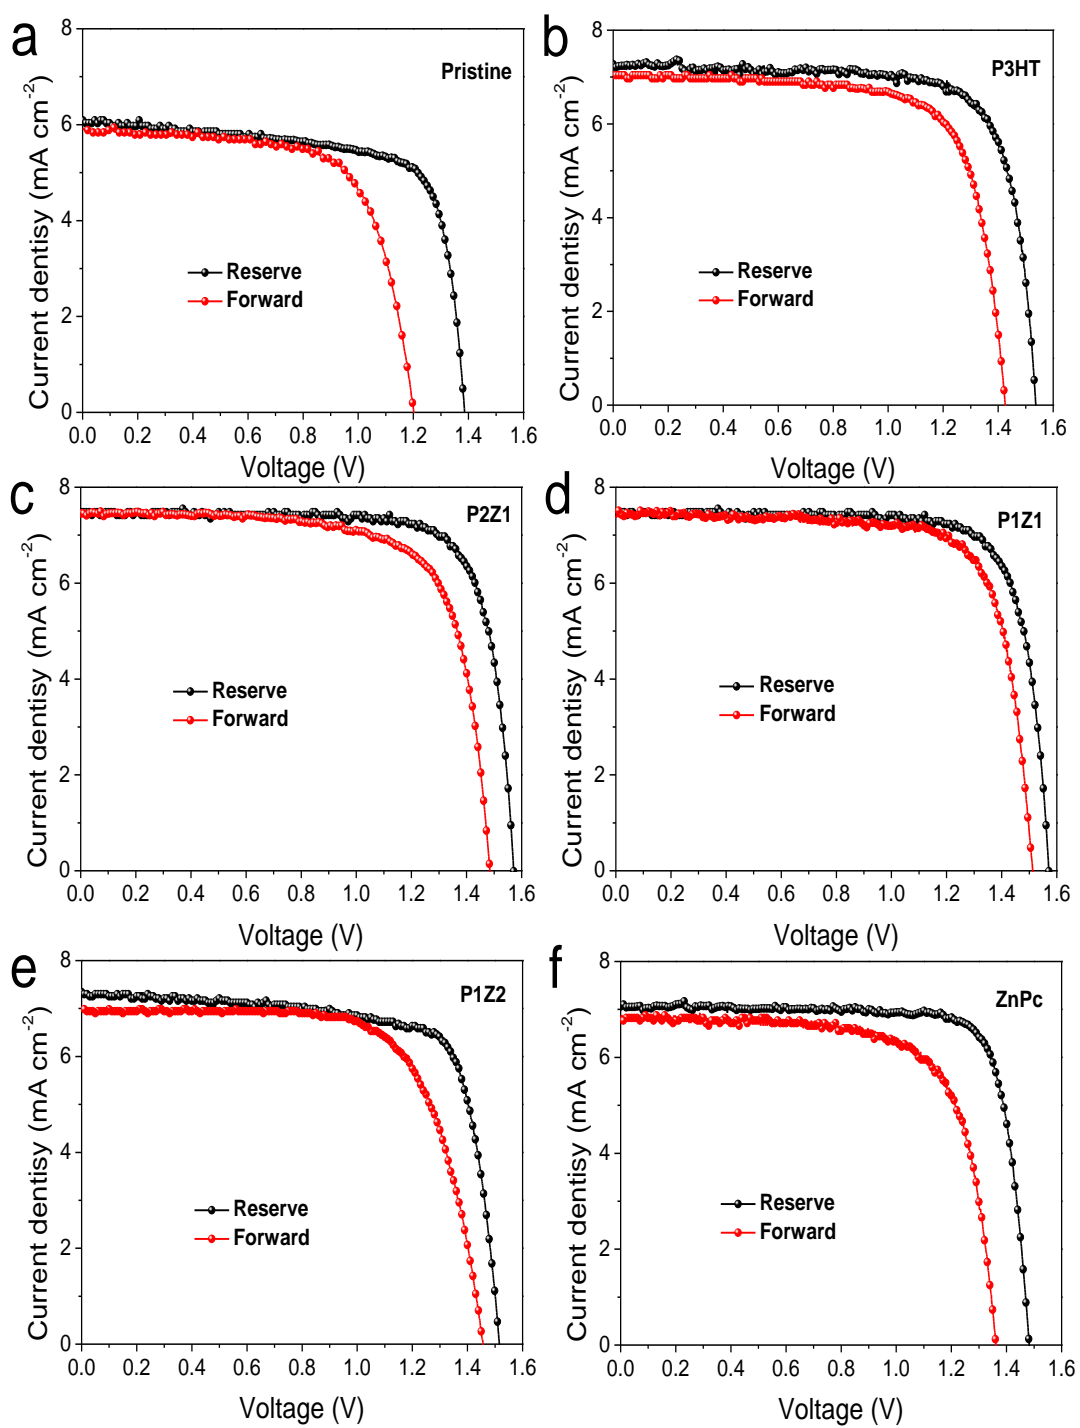

**Fig. S9.** Photocurrent–voltage ( $J$ – $V$ ) curves of CsPbBr<sub>3</sub> PSCs with and without HTMs under forward and reverse scan directions.

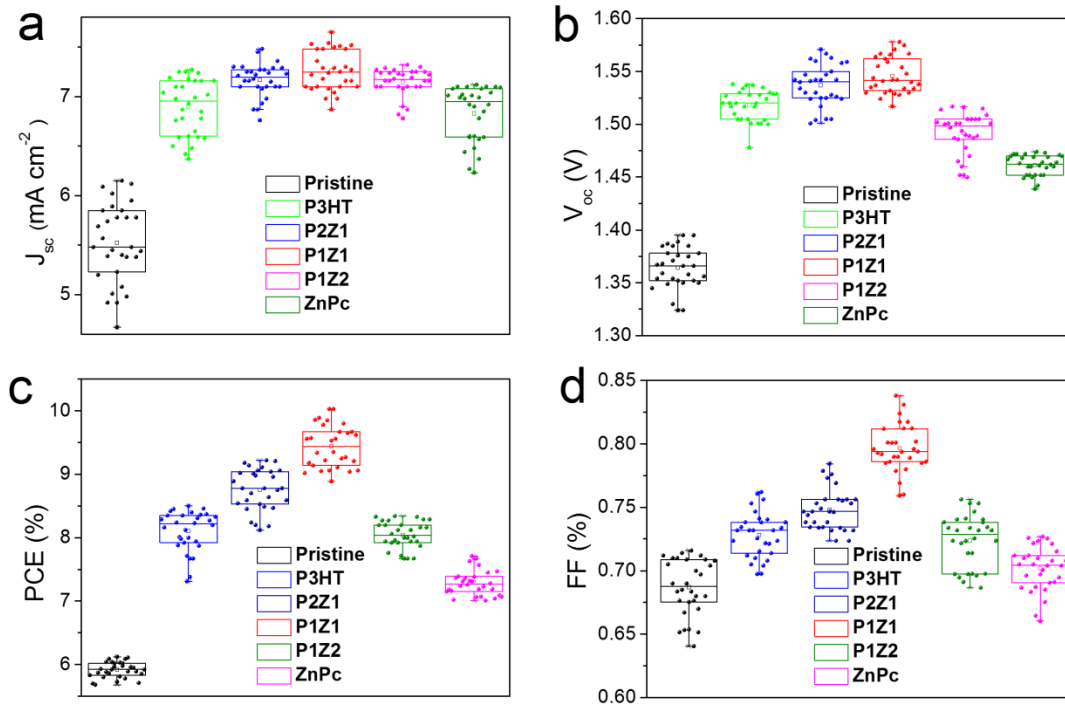

**Fig. S10.** Statistical distribution of the photovoltaic parameters of CsPbBr<sub>3</sub> PSCs with and without HTMs. (a) Distribution of  $J_{sc}$ . (b) Distribution of  $V_{oc}$ . (c) Distribution of  $FF$  and (d) Distribution of  $PCE$ .

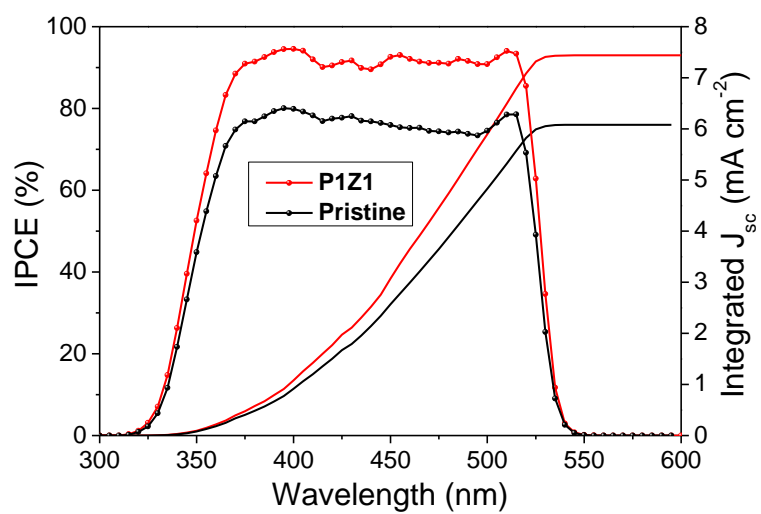

**Fig. S11.** IPCE spectra of HTM-free and P1Z1 HTM based CsPbBr<sub>3</sub> PSCs.

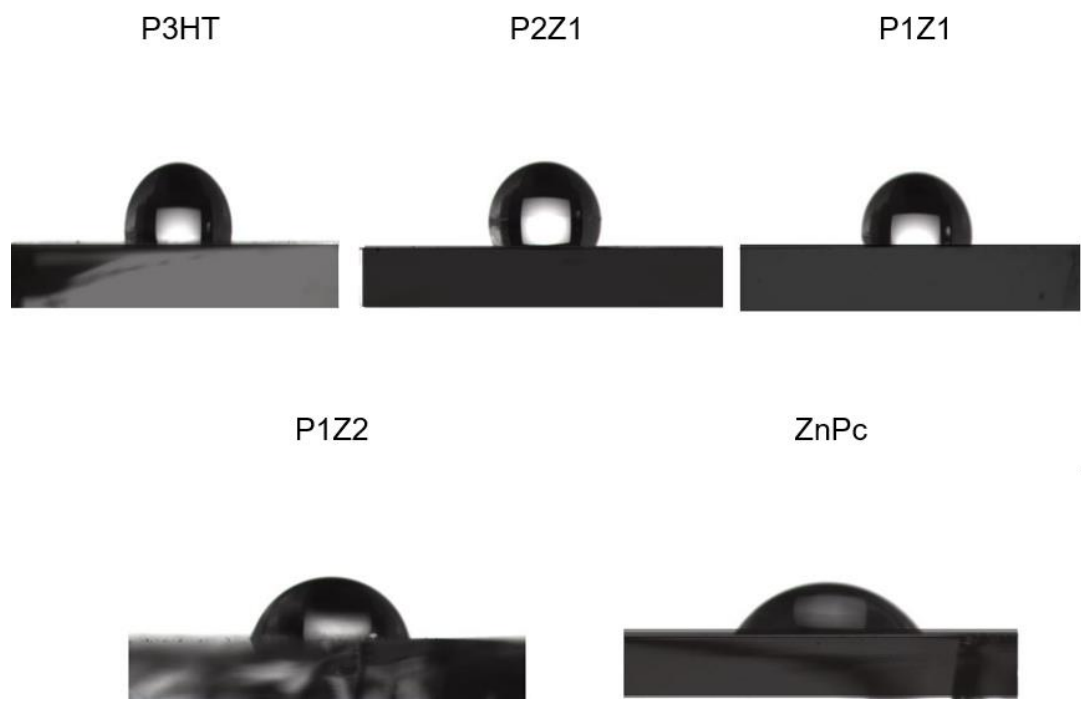

**Fig. S12.** Contact angle of 99.7°, 113.1°, 101.2°, 74.0° and 52.3° for P3HT, P2Z1, P1Z1, P1Z2 and ZnPc, respectively.

**Table S1.** The HOMO, LUMO energy levels and bandgaps of different HTMs.

| HTM        | P3HT  | P2Z1  | P1Z1  | P1Z2  | ZnPc  |
|------------|-------|-------|-------|-------|-------|
| LUMO (eV)  | -3.01 | -3.02 | -3.03 | -3.15 | -3.17 |
| HOMO (eV)  | -5.13 | -5.15 | -5.16 | -5.29 | -5.33 |
| $E_g$ (eV) | 2.12  | 2.13  | 2.13  | 2.14  | 2.16  |

**Table S2.** TRPL decay parameters of excitonic transitions for CsPbBr<sub>3</sub> PSCs with and without HTMs..

| HTMs              | HTM-free | P3HT   | P2Z1  | P1Z1  | P1Z2  | ZnPc  |
|-------------------|----------|--------|-------|-------|-------|-------|
| $\tau_1$ (ns)     | 0.32     | 0.18   | 0.07  | 0.05  | 0.08  | 0.15  |
| $f_1$ (%)         | 43.60    | 62.20  | 83.72 | 88.84 | 88.07 | 39.54 |
| $\tau_2$ (ns)     | 2.04     | 1.3913 | 0.97  | 0.89  | 1.37  | 1.74  |
| $f_2$ (%)         | 56.40    | 37.80  | 16.28 | 11.16 | 11.93 | 60.46 |
| $\tau_{ave}$ (ns) | 0.60     | 0.27   | 0.07  | 0.06  | 0.09  | 0.34  |

$$\tau_{ave} (\text{ns}) = (f_1\tau_1^2 + f_2\tau_2^2) / (f_1\tau_1 + f_2\tau_2)$$



**Table S3.** Photovoltaic parameters of CsPbBr<sub>3</sub> PSCs based on P1Z1 HTM with different concentrations.

| P1Z1 HTM              | $J_{sc}$ (mA cm <sup>-2</sup> ) | $V_{oc}$ (V) | $FF$ (%) | PCE (%) |
|-----------------------|---------------------------------|--------------|----------|---------|
| 3 mg mL <sup>-1</sup> | 6.62                            | 1.511        | 82.07    | 8.21    |
| 5 mg mL <sup>-1</sup> | 7.652                           | 1.578        | 83.06    | 10.03   |
| 7 mg mL <sup>-1</sup> | 6.67                            | 1.497        | 81.12    | 8.57    |
| 9 mg mL <sup>-1</sup> | 6.37                            | 1.46         | 81.29    | 7.56    |

**Table S4.** Photovoltaic parameters of device based on pristine CsPbBr<sub>3</sub>, and CsPbBr<sub>3</sub> after 200 °C annealed, CB treated, and 200 °C annealed after CB treated.

| CsPbBr <sub>3</sub> | $J_{sc}$ (mA cm <sup>-2</sup> ) | $V_{oc}$ (V) | $FF$ (%) | PCE (%) |
|---------------------|---------------------------------|--------------|----------|---------|
| Pristine            | 6.15                            | 1.390        | 71.59    | 6.12    |
| 200 °C              | 6.2                             | 1.378        | 72.05    | 6.16    |
| CB treated          | 6.12                            | 1.376        | 69.77    | 5.87    |
| CB treated + 200 °C | 6.22                            | 1.423        | 72.09    | 6.38    |

**Table S5.** EIS parameters of CsPbBr<sub>3</sub> PSCs with and without HTMs.

| HTMs     | $R_s$ ( $\Omega$ cm <sup>2</sup> ) | $R_{rec}$ ( $\Omega$ cm <sup>2</sup> ) | CPE (nF cm <sup>-2</sup> ) |
|----------|------------------------------------|----------------------------------------|----------------------------|
| HTM-free | 4.60                               | 21.03                                  | 118.18                     |
| P3HT     | 3.46                               | 78.77                                  | 50.67                      |
| P1Z1     | 3.43                               | 106.07                                 | 32.49                      |
| ZnPc     | 4.55                               | 30.46                                  | 56.19                      |
